# Supplementary material for: An analysis of the Sargasso Sea resource and the consequences for database composition
Source: Springer Nature journal article supplement (doi:10.1186/1471-2105-7-213), 2006-04-19
Supplement: 12859_2005_952_MOESM3_ESM.pdf [file 12859_2005_952_MOESM3_ESM.pdf]

Query: DAIPGPLGPQSASLEGKVALVTGAGRGIGREMAMELGRRGCKVIVNYANSTESAEVVAIAIKKNGSDAACVKAN  
|| ||| || | | |||| ||| |||| |

Optimal: DAMPGPMGPKSFNLKGKVALITGASSGIGRAIAKHAKNWWWVWWWDCWWWWWWWWWWCWWWWWWWWWWC

Query: VGVVEDIVRMFEEAVKIFGKLDIVCSNSGVVSFGHVKDVTPEEFDRVFTINTRGQFFVAREAYKHLEIGGRLIL

Optimal: WWWWWWCCWWWWWWWWWWWWWWWWWWNWWWWWWWWWWWWWWWWWWNWWWWWWWHWWWWWWWWWWWWWW

Query: MGSITGQAKAVPKHAVYSGSKGAIETFARCMAIDMADKKITVNVVAPGGIKTDMYHAVCREYIPNGENLSNEEV  
||

Optimal: WIWWWWWWWWWWWWWWCCSKAWCWWWWWWWWWWAWWWWCCWWCWWCRWEWWDKMWWWWWWWWWWWWWW

Query: DEYAAVQWSPLRRVGLPIDIARVVCFLASNDGGWVTGKVIKIDGGACM

Optimal: WWWWWWWWWCWWWWWEDIAWAVVFLCSDESSYITGQIIHVDGGWTM  
| ||| ||| | ||| |
