# Supplementary material for: An analysis of the Sargasso Sea resource and the consequences for database composition
Source: Springer Nature journal article supplement (doi:10.1186/1471-2105-7-213), 2006-04-19

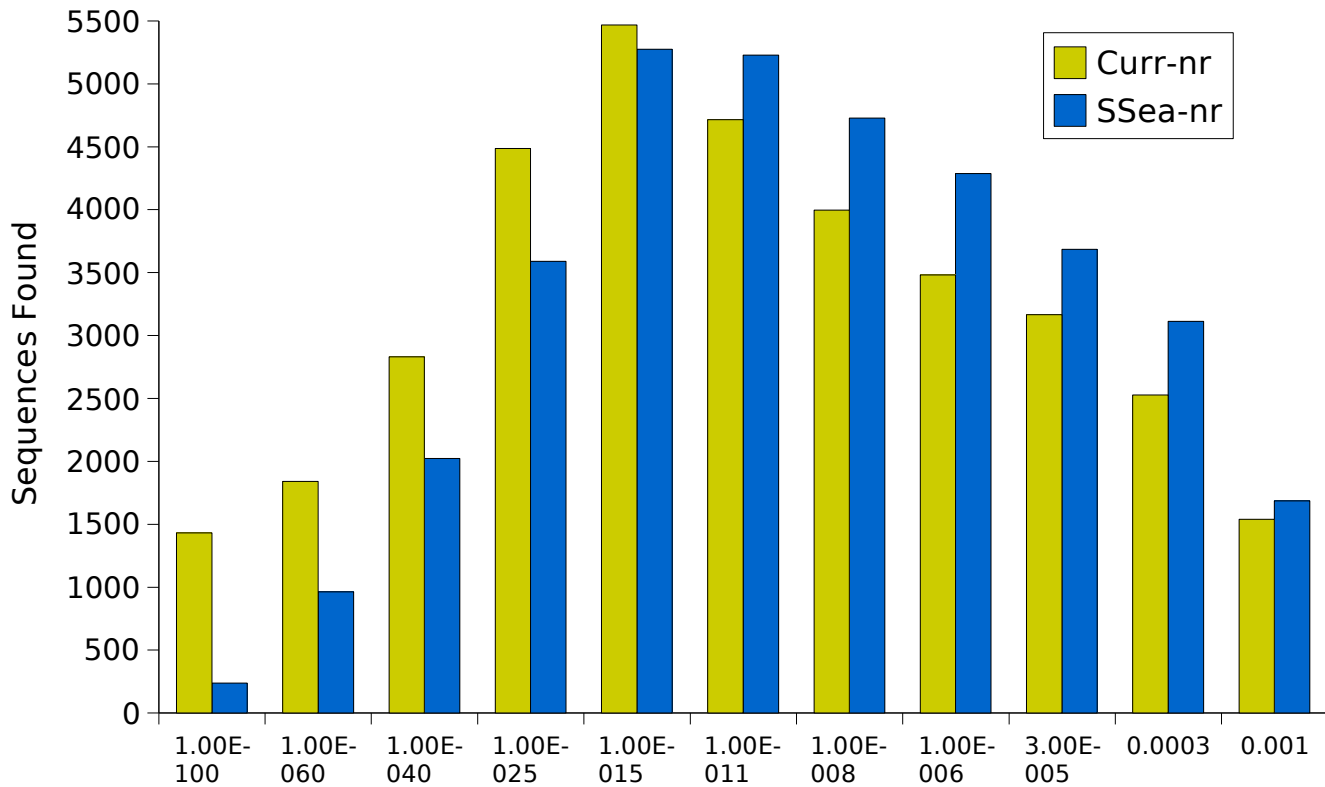

Supplement: 12859_2005_952_MOESM7_ESM.pdf [file 12859_2005_952_MOESM7_ESM.pdf]
